# Supplementary material for: Cell-type-specific differences in KDEL receptor clustering in mammalian cells
Source: PubMed Central journal article supplement (PMC7347126; doi:10.1371/journal.pone.0235864), 2020-07-09
Supplement: pone.0235864.s002.pdf [file pone.0235864.s002.pdf]

**Supplementary Table S1. Primer sequences used in this study**

| Primer name                  | 5'-3' sequence                                                         |
|------------------------------|------------------------------------------------------------------------|
| 5'-RTA <sup>E177D</sup>      | GAATTCGGATCCATGATATTCCCCAAACAATACCCAATTATAAACTTTACC                    |
| 3'-RTA <sup>E177D</sup>      | AAGCTTGTCTGACTTAATGATGATGATGATGATGAAACTGTGACGATGGTGGAGGTGC             |
| 3'-RTA <sup>E177D-HDEL</sup> | AAGCTTGTCTGACTTACAGTTCATCATGATGATGATGATGATGATGAAACTGTGACGATGGTGGAGGTGC |
