# Supplementary material for: Cell-type-specific differences in KDEL receptor clustering in mammalian cells
Source: PubMed Central journal article supplement (PMC7347126; doi:10.1371/journal.pone.0235864), 2020-07-09
Supplement: pone.0235864.s003.pdf [file pone.0235864.s003.pdf]

**Supplementary Table S2. Nucleotide sequences for qPCR primers (ordered from Invitrogen)**

| Target                 | Forward                      | Reverse                       |
|------------------------|------------------------------|-------------------------------|
| Human KDELR1 NC 000019 | CACAGCCATTCTGGCGTTCCTG       | CCATGAACAGCTGCGGCAAGAT        |
| Human KDELR2 NC 000007 | CTGGTCTTCACAACTCGTTACCTGGATC | CAGGTAGATCAGGTACACTGTGGCATAGG |
| Human KDELR3 NC 000022 | CTTCTGGTCCCAGTCATTGGCCT      | GGGGCAGGATAGCCACTGATTCC       |
| Human GAPDH NC 000012  | TTCGACAGTCAGCCGCATCT         | GCCCAATACGACCAAATCCGTT        |
| Mouse KDELR1 NC 000073 | GTGGTGTTCACTGCCCCGATA        | AACTCCACCCGGAAAGTGTC          |
| Mouse KDELR2 NC 000071 | TGGTCTTCACGACTCGCTAC         | AGGTACACCGTGGCATAGGA          |
| Mouse KDELR3 NC 000081 | CTTCATCTCCATCTACAACACAGTG    | CTCCAGCCGGAATGTGTCAT          |
| Mouse GAPDH NC 000072  | GAGAGTGTTTCTCGTCCCG          | TCCCGTTGATGACAAGCTTCC         |
