# Supplementary material for: Cell-type-specific differences in KDEL receptor clustering in mammalian cells
Source: PubMed Central journal article supplement (PMC7347126; doi:10.1371/journal.pone.0235864), 2020-07-09
Supplement: pone.0235864.s004.pdf [file pone.0235864.s004.pdf]

**Supplementary Table S3. Overview of the basic characteristics of the cell lines used in this study**

| Name     | Morphology | Tissue                                      | Organism     | Source                             |
|----------|------------|---------------------------------------------|--------------|------------------------------------|
| HeLa     | epithelial | cervix                                      | Homo sapiens | ATCC                               |
| HEK-293T | epithelial | embryonic kidney                            | Homo sapiens | Invitrogen                         |
| SH-SY5Y  | neuroblast | bone marrow                                 | Homo sapiens | Sigma                              |
| THP1     | monocyte   | peripheral blood                            | Homo sapiens | ATCC                               |
| MEF      | fibroblast | embryo fibroblast                           | Mus musculus | Gift from Prof. Aránzazu del Campo |
| L929     | fibroblast | subcutaneous connective tissue              | Mus musculus | Gift from Prof. Aránzazu del Campo |
| RAW-Blue | macrophage | Abelson murine leukemia virus-induced tumor | Mus musculus | Invitrogen                         |
| IC21     | macrophage | peritoneum                                  | Mus musculus | Gift from Prof. Gernot Geginat     |
